# Supplementary material for: Etelcalcetide use During Maintenance Hemodialysis and Incidence of Parathyroidectomy After Kidney Transplantation
Source: PubMed Central journal article supplement — Kidney Int Rep. 2024 Apr 4;9(7):2146–56. doi: 10.1016/j.ekir.2024.04.004 (PMC11284412; doi:10.1016/j.ekir.2024.04.004), 2024-04-04
Supplement: mmc1.pdf [file mmc1.pdf]

## SUPPLEMENTAL TABLE OF CONTENTS

### **Greater risk of severe hyperparathyroidism requiring early parathyroidectomy after kidney transplantation in patients treated with etelcalcetide.**

|                                                                                                                                             |        |
|---------------------------------------------------------------------------------------------------------------------------------------------|--------|
| <b>Supplemental Table 1.</b> List of collaborative authors of the CUSL Kidney Transplantation Network .....                                 | Page 2 |
| <b>Supplemental Table 2.</b> Supplemental baseline characteristics.....                                                                     | Page 3 |
| <b>Supplemental Table 3:</b> Dose of etelcalcetide and occurrence of parathyroidectomy after kidney transplantation .....                   | Page 4 |
| <b>Supplemental Figure 1.</b> Plasma calcium and iPTH levels at the time of parathyroidectomy in cinacalcet and etelcalcetide patients..... | Page 5 |
| <b>Supplemental Figure 2.</b> New prescriptions of cinacalcet and etelcalcetide over the study period .....                                 | Page 6 |

**Supplemental Table 1.** List of collaborative authors of the CUSL Kidney Transplantation Network

| <b>NAME</b>             | <b>AFFILIATION</b>                                                               |
|-------------------------|----------------------------------------------------------------------------------|
| Pierre-Yves Declaire    | Service de néphrologie, Clinique Sud Luxembourg, Arlon, Belgium                  |
| Marie Rommelaere        | Service de néphrologie, Hôpital Princesse Fabiola, Aye, Belgium                  |
| Miguel-Ange Guillen     | Service de néphrologie, CHR Epicura, Mons, Belgium                               |
| Benoit Buyschaert       | Service de néphrologie, CHR de Huy, Huy, Belgium                                 |
| Bénédicte Vanderperren  | Service de néphrologie, Centre hospitalier de Jolimont, La Louvière, Belgium     |
| Charles Cuvelier        | Service de néphrologie, CHU UCL-Namur – Site Ste Elisabeth, Namur, Belgium       |
| Benoît Georges          | Service de néphrologie, CHR Sambre-Meuse (Namur), Namur, Belgium                 |
| Eugenia Papakrivopoulou | Service de néphrologie, Clinique Saint-Jean, Brussels, Belgium                   |
| Claude Braun            | Service de néphrologie, Hôpitaux Roberts Schuman, Luxembourg, Luxembourg         |
| Gaëlle Gillerot         | Service de néphrologie, Clinique Saint-Pierre, Ottignies, Belgium                |
| Jean-Philippe Lengelé   | Service de néphrologie, Grand Hôpital de Charleroi, Charleroi, Belgium           |
| François Reginster      | Service de néphrologie, Cliniques de l'Europe, Brussels, Belgium                 |
| Philippe Leroy          | Service de néphrologie, Hôpital de mons – Groupe Jolimont, Mons, Belgium         |
| Ann-Karolien Vandooren  | Service de néphrologie, CH de Mouscron, Mouscron, Belgium                        |
| Philippe Madhoun        | Service de néphrologie, Centre Hospitalier de Wallonie picarde, Tournai, Belgium |

**Supplemental Table 2.** Supplemental baseline characteristics

|                             | <b>Whole cohort<br/>n=372</b> | <b>No calcimimetic<br/>n=262</b> | <b>Cinacalcet<br/>n=75</b> | <b>Etelcalcetide<br/>n=35</b> | <i>P</i> |
|-----------------------------|-------------------------------|----------------------------------|----------------------------|-------------------------------|----------|
| Type of donor – no. (%)     |                               |                                  |                            |                               | 0.02     |
| Deceased                    | 311 (84)                      | 210 (80)                         | 69 (92)                    | 32 (91)                       |          |
| Living                      | 61 (16)                       | 52 (20)                          | 6 (8)                      | 3 (9)                         |          |
| Graft rank – no. (%)        |                               |                                  |                            |                               | 0.035    |
| 1                           | 330 (89)                      | 238 (91)                         | 60 (80)                    | 33 (94)                       |          |
| 2                           | 36 (10)                       | 20 (8)                           | 14 (19)                    | 2 (6)                         |          |
| 3                           | 5 (1)                         | 4 (1)                            | 1 (1)                      | 0 (0)                         |          |
| PRA, % (mean±SD)            | 19±32                         | 17±31                            | 22±34                      | 24±36                         | 0.29     |
| HLA Mismatch (es) – no. (%) |                               |                                  |                            |                               | 0.826    |
| 0                           | 27 (7)                        | 15 (6)                           | 9 (12)                     | 3 (8,5)                       |          |
| 1                           | 28 (8)                        | 20 (7,5)                         | 5 (6,6)                    | 3 (8,5)                       |          |
| 2                           | 94 (25)                       | 66 (25)                          | 20 (26,6)                  | 8 (23)                        |          |
| 3                           | 140 (38)                      | 99 (38)                          | 27 (36)                    | 14 (40)                       |          |
| 4                           | 40 (11)                       | 29 (11)                          | 6 (8)                      | 5 (14)                        |          |
| 5                           | 21 (5,5)                      | 18 (7)                           | 2 (2,7)                    | 1 (3)                         |          |
| 6                           | 5 (1)                         | 3 (1)                            | 2 (2,7)                    | 0 (0)                         |          |
| Missing                     | 17 (4,5)                      | 12 (4,5)                         | 4 (5,3)                    | 1 (3)                         |          |
| Induction therapy – no. (%) | 135 (36)                      | 96 (36)                          | 28 (37)                    | 11 (31)                       | 0.816    |

**Supplemental Table 3. Dose of etelcalcetide and occurrence of parathyroidectomy after kidney transplantation.**

|                                          | No PTX<br>n=25 | PTX<br>n=10 | P           |
|------------------------------------------|----------------|-------------|-------------|
| <b>Dose etelcalcetide (mg) – no. (%)</b> |                |             | <b>0.02</b> |
| 2.5                                      | 5 (20)         | 2 (20)      |             |
| 5                                        | 13 (52)        | 2 (20)      |             |
| 7.5                                      | 2 (8)          | 0 (0)       |             |
| 10                                       | 5 (20)         | 2 (20)      |             |
| 15                                       | 0 (0)          | 4 (40)      |             |

**Supplemental Figure 1.** Plasma calcium and iPTH levels at the time of parathyroidectomy in cinacalcet and etelcalcetide patients.

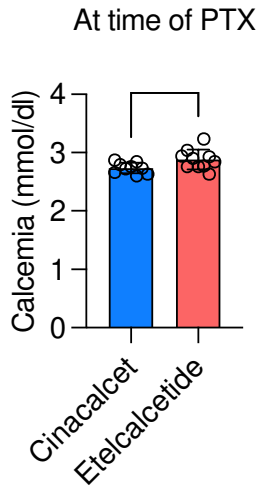

|                | Cinacalcet<br>(n=9) | Etelcalcetide<br>(n=10) |
|----------------|---------------------|-------------------------|
| 25% Percentile | 2.645               | 2.760                   |
| Median         | 2.730               | 2.870                   |
| 75% Percentile | 2.815               | 2.965                   |

P-value = 0.03 (Mann-Whitney)

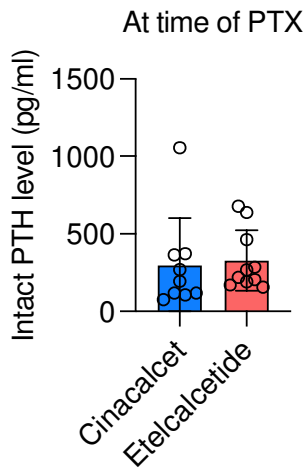

|                | Cinacalcet<br>(n=9) | Etelcalcetide<br>(n=10) |
|----------------|---------------------|-------------------------|
| 25% Percentile | 112.0               | 186.0                   |
| Median         | 194.0               | 243.5                   |
| 75% Percentile | 368.0               | 506.8                   |

P-value = 0.34 (Mann-Whitney)

**Supplemental Figure 2.** New prescriptions of cinacalcet and etelcalcetide over the study period. Etelcalcetide became commercially available in Belgium in 2018.

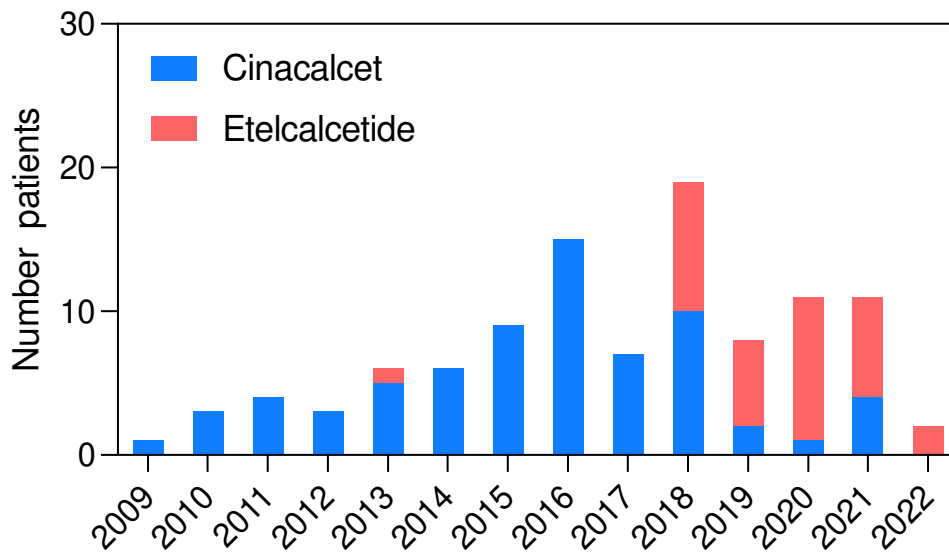

One patient was receiving etelcalcetide in 2013 during participation to the phase 3 trial and its extension.
